# Supplementary material for: CRISPR-Cas9 engineering of the RAG2 locus via complete coding sequence replacement for therapeutic applications
Source: PubMed Central journal article supplement (PMC10611791; doi:10.1038/s41467-023-42036-5), 2023-10-27
Supplement: 41467_2023_42036_MOESM3_ESM.pdf [file 41467_2023_42036_MOESM3_ESM.pdf]

**Title:** Supplementary Data 1

**Description:** rAAV Donor Sequences – all of the exact sequences of the different donors

**Title:** Supplementary Data 2

**Description:** Representative ONT HDR reads – an example read of perfect HDR for both donors along with the reference expected sequence following perfect HDR for the two donors
